# Supplementary material for: Survival After Breast Conservation vs Mastectomy Adjusted for Comorbidity and Socioeconomic Status: A Swedish National 6-Year Follow-up of 48 986 Women
Source: PubMed Central journal article supplement (PMC8100916; doi:10.1001/jamasurg.2021.1438), 2021-05-05

## Supplemental Online Content

de Boniface J, Szulkin R, Johansson ALV. Survival after breast conservation vs mastectomy adjusted for comorbidity and socioeconomic status: a Swedish national 6-year follow-up of 48 986 women. *JAMA Surg*. Published online May 5, 2021. doi:10.1001/jamasurg.2021.1438

**eTable 1.** ICD-10 codes based on the Royal College of Surgeons' adaptation of the Charlson Comorbidity Index

**eTable 2.** Hazard ratios of OS and BCSS for locoregional treatment and prognostic group by short (0-5 years) and long (>5 years) follow-up

**eFigure 1.** CONSORT diagram for all primary breast cancer cases diagnosed in Sweden 2008-2017

**eFigure 2.** Survival proportions for breast cancer-specific survival by locoregional treatment group and age

**eFigure 3.** Survival proportions for overall survival by locoregional treatment group and prognostic group

**eFigure 4.** Survival proportions for overall survival by locoregional treatment group and age

This supplemental material has been provided by the authors to give readers additional information about their work.

**eTable 1. ICD-10 codes based on the Royal College of Surgeons' adaptation of the Charlson Comorbidity Index**

| <b>Disease category</b>                             | <b>Weight</b> | <b>ICD-10</b>                                                                                                                                                                                                                                                                                                                                                                                                                      |
|-----------------------------------------------------|---------------|------------------------------------------------------------------------------------------------------------------------------------------------------------------------------------------------------------------------------------------------------------------------------------------------------------------------------------------------------------------------------------------------------------------------------------|
| Diabetes mellitus                                   | 1             | E10, E11, E12, E13, E14                                                                                                                                                                                                                                                                                                                                                                                                            |
| Dementia                                            | 1             | F00, F01, F02, F03, G30, G31, A81, F05                                                                                                                                                                                                                                                                                                                                                                                             |
| Cerebrovascular Disease                             | 1             | G45, G46, I60, I61, I62, I63, I64, I65, I66, I67, I68, I69                                                                                                                                                                                                                                                                                                                                                                         |
| Congestive Heart Failure                            | 1             | I11, I42, I43, I50, I51                                                                                                                                                                                                                                                                                                                                                                                                            |
| Congestive Heart Failure or Renal Disease *         | 1             | I13                                                                                                                                                                                                                                                                                                                                                                                                                                |
| Myocardial Infarction                               | 1             | I21, I22, I23                                                                                                                                                                                                                                                                                                                                                                                                                      |
| Congestive Heart Failure or Myocardial Infarction * | 1             | I25                                                                                                                                                                                                                                                                                                                                                                                                                                |
| Chronic Pulmonary Disease                           | 1             | I26, I27, J40, J41, J42, J43, J44, J45, J46, J47, J60, J61, J62, J63, J64, J65, J66, J67, J68, J70                                                                                                                                                                                                                                                                                                                                 |
| Peripheral Vascular Disease                         | 1             | I70, I71, I72, I73, I77, K55, Z95                                                                                                                                                                                                                                                                                                                                                                                                  |
| Rheumatological Disease                             | 1             | M05, M06, M09, M32, M33, M34, M35, M36, M12, M31                                                                                                                                                                                                                                                                                                                                                                                   |
| Any malignancy                                      | 2             | C00, C01, C02, C03, C04, C05, C06, C07, C08, C09, C10, C11, C12, C13, C14, C15, C16, C17, C18, C19, C20, C21, C22, C23, C24, C25, C26, C30, C31, C32, C33, C34, C37, C38, C39, C40, C41, C43, C45, C46, C47, C48, C49, C50, C51, C52, C53, C54, C55, C56, C57, C58, C60, C61, C62, C63, C64, C65, C66, C67, C68, C69, C70, C71, C72, C73, C74, C75, C76, C80, C81, C82, C83, C84, C85, C88, C90, C91, C92, C93, C94, C95, C96, C97 |
| Hemiplegia or paraplegia                            | 2             | G81, G82, G83, G11                                                                                                                                                                                                                                                                                                                                                                                                                 |
| Renal Disease                                       | 2             | I12, N01, N03, N05, N07, N08, N18, N19, N25, Z49, N17, Z99                                                                                                                                                                                                                                                                                                                                                                         |
| Renal Disease or Liver Disease *                    | 2             | Z94                                                                                                                                                                                                                                                                                                                                                                                                                                |
| Liver Disease                                       | 3             | B18, I85, K70, K71, K76, I86, I98, K72                                                                                                                                                                                                                                                                                                                                                                                             |
| AIDS/HIV                                            | 6             | B20, B21, B22, B24                                                                                                                                                                                                                                                                                                                                                                                                                 |
| Metastatic solid tumor                              | 6             | C77, C78, C79                                                                                                                                                                                                                                                                                                                                                                                                                      |

\* Due to ICD-10 being included as 3-digit codes in the patient register, it was not possible to separate these diseases.

**eTable 2. Hazard ratios of OS and BCSS for locoregional treatment and prognostic group by short (0-5 years) and long (>5 years) follow-up.**

|                              | OS                       |         | OS                       |         | BCSS                     |         | BCSS                     |         |
|------------------------------|--------------------------|---------|--------------------------|---------|--------------------------|---------|--------------------------|---------|
|                              | 0-5 year                 |         | >5 year                  |         | 0-5 year                 |         | >5 year                  |         |
|                              | HR (95% CI) <sup>a</sup> | p-value | HR (95% CI) <sup>a</sup> | p-value | HR (95% CI) <sup>a</sup> | p-value | HR (95% CI) <sup>a</sup> | p-value |
| <b>All prognostic groups</b> |                          |         |                          |         |                          |         |                          |         |
| BCS+RT                       | 1.00 (reference)         |         | 1.00 (reference)         |         | 1.00 (reference)         |         | 1.00 (reference)         |         |
| Mx-RT                        | 1.83 (1.67-2.00)         | <0.001  | 1.72 (1.55-1.92)         | <0.001  | 1.78 (1.52-2.09)         | <0.001  | 1.45 (1.15-1.82)         | 0.001   |
| Mx+RT                        | 1.25 (1.11-1.41)         | <0.001  | 1.24 (1.07-1.43)         | 0.004   | 1.34 (1.13-1.60)         | <0.001  | 1.17 (0.91-1.49)         | 0.224   |
| <b>Prognostic group:</b>     |                          |         |                          |         |                          |         |                          |         |
| <b>T1N0</b>                  |                          |         |                          |         |                          |         |                          |         |
| BCS+RT                       | 1.00 (reference)         |         | 1.00 (reference)         |         | 1.00 (reference)         |         | 1.00 (reference)         |         |
| Mx-RT                        | 1.53 (1.33-1.76)         | <0.001  | 1.59 (1.36-1.87)         | <0.001  | 1.55 (1.12-2.13)         | 0.008   | 1.88 (1.30-2.73)         | <0.001  |
| Mx+RT                        | 1.37 (0.93-2.02)         | 0.117   | 1.38 (0.89-2.13)         | 0.146   | 1.54 (0.77-3.07)         | 0.224   | 2.19 (1.04-4.60)         | 0.039   |
| <b>T1N1</b>                  |                          |         |                          |         |                          |         |                          |         |
| BCS+RT                       | 1.00 (reference)         |         | 1.00 (reference)         |         | 1.00 (reference)         |         | 1.00 (reference)         |         |
| Mx-RT                        | 2.00 (1.51-2.65)         | <0.001  | 2.04 (1.46-2.86)         | <0.001  | 1.21 (0.68-2.17)         | 0.514   | 0.58 (0.22-1.57)         | 0.287   |
| Mx+RT                        | 1.31 (0.97-1.78)         | 0.078   | 1.64 (1.13-2.37)         | 0.009   | 1.73 (1.09-2.75)         | 0.021   | 1.08 (0.50-2.35)         | 0.842   |
| <b>T1N2</b>                  |                          |         |                          |         |                          |         |                          |         |
| BCS+RT                       | 1.00 (reference)         |         | 1.00 (reference)         |         | 1.00 (reference)         |         | 1.00 (reference)         |         |
| Mx-RT                        | 4.32 (2.22-8.42)         | <0.001  | 2.51 (0.90-7.04)         | 0.08    | 5.77 (2.37-14.02)        | <0.001  | 4.31 (1.19-15.56)        | 0.026   |
| Mx+RT                        | 1.30 (0.77-2.21)         | 0.327   | 1.32 (0.73-2.40)         | 0.358   | 1.62 (0.83-3.16)         | 0.157   | 0.90 (0.40-2.04)         | 0.809   |
| <b>T2N0</b>                  |                          |         |                          |         |                          |         |                          |         |
| BCS+RT                       | 1.00 (reference)         |         | 1.00 (reference)         |         | 1.00 (reference)         |         | 1.00 (reference)         |         |
| Mx-RT                        | 1.78 (1.47-2.16)         | <0.001  | 1.58 (1.26-1.99)         | <0.001  | 1.70 (1.26-2.29)         | <0.001  | 1.55 (1.00-2.42)         | 0.051   |
| Mx+RT                        | 1.35 (0.93-1.96)         | 0.117   | 1.77 (1.21-2.60)         | 0.003   | 1.39 (0.80-2.40)         | 0.241   | 2.17 (1.11-4.24)         | 0.023   |
| <b>T2N1</b>                  |                          |         |                          |         |                          |         |                          |         |

|             |                                    |                     |                                    |                     |                                    |                     |                                    |                     |
|-------------|------------------------------------|---------------------|------------------------------------|---------------------|------------------------------------|---------------------|------------------------------------|---------------------|
| BCS+RT      | 1.00<br>(reference<br>)            |                     | 1.00<br>(reference<br>)            |                     | 1.00<br>(reference<br>)            |                     | 1.00<br>(reference<br>)            |                     |
| Mx-RT       | 2.09 (1.63-<br>2.69)               | <0.00<br>1          | 2.04 (1.49-<br>2.78)               | <0.00<br>1          | 1.68 (1.19-<br>2.38)               | 0.003               | 1.17 (0.67-<br>2.05)               | 0.573               |
| Mx+RT       | 1.23 (0.95-<br>1.58)               | 0.11                | 1.49 (1.09-<br>2.05)               | 0.013               | 1.10 (0.80-<br>1.51)               | 0.566               | 1.59 (0.98-<br>2.58)               | 0.061               |
|             |                                    |                     |                                    |                     |                                    |                     |                                    |                     |
|             | <b>OS</b>                          |                     | <b>OS</b>                          |                     | <b>BCSS</b>                        |                     | <b>BCSS</b>                        |                     |
|             | <b>0-5 year</b>                    |                     | <b>&gt;5 year</b>                  |                     | <b>0-5 year</b>                    |                     | <b>&gt;5 year</b>                  |                     |
|             | <b>HR (95%<br/>CI)<sup>a</sup></b> | <b>p-<br/>value</b> | <b>HR (95%<br/>CI)<sup>a</sup></b> | <b>p-<br/>value</b> | <b>HR (95%<br/>CI)<sup>a</sup></b> | <b>p-<br/>value</b> | <b>HR (95%<br/>CI)<sup>a</sup></b> | <b>p-<br/>value</b> |
| <b>T2N2</b> |                                    |                     |                                    |                     |                                    |                     |                                    |                     |
| BCS+RT      | 1.00<br>(reference<br>)            |                     | 1.00<br>(reference<br>)            |                     | 1.00<br>(reference<br>)            |                     | 1.00<br>(reference<br>)            |                     |
| Mx-RT       | 3.45 (2.21-<br>5.40)               | <0.00<br>1          | 2.13 (1.16-<br>3.92)               | 0.015               | 3.12 (1.80-<br>5.41)               | <0.00<br>1          | 0.95 (0.30-<br>2.97)               | 0.931               |
| Mx+RT       | 1.75 (1.17-<br>2.59)               | 0.006               | 0.77 (0.49-<br>1.22)               | 0.272               | 1.64 (1.04-<br>2.59)               | 0.035               | 0.66 (0.35-<br>1.25)               | 0.203               |

<sup>a</sup> Adjusted for age and calendar year at diagnosis, region, country of birth, family income, highest education, Nottingham grade, subtype, and Charlson Comorbidity Index one year prior to surgery.

OS, overall survival; BCSS, breast cancer-specific survival; BCS, breast-conserving surgery; Mx, mastectomy; RT, radiotherapy

**eFigure 1. CONSORT diagram for all primary breast cancer cases diagnosed in Sweden 2008-2017**

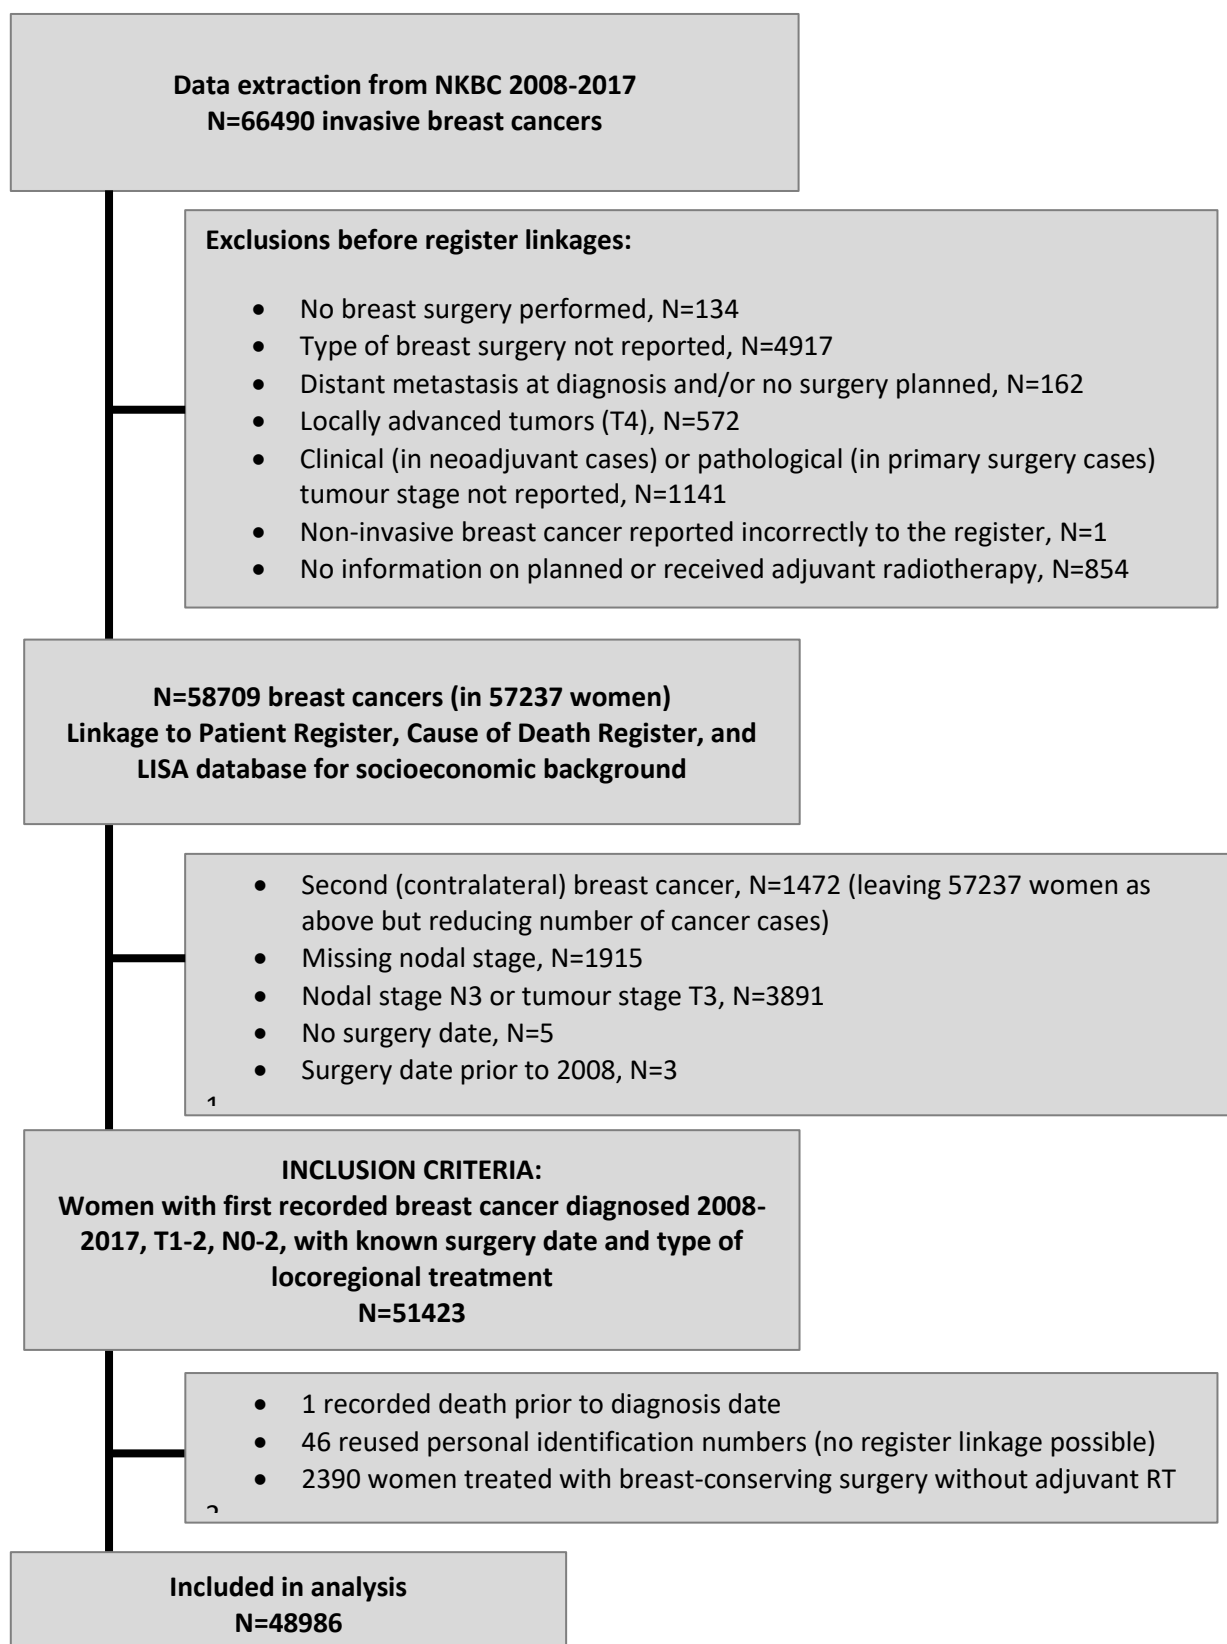

**eFigure 2. Survival proportions for breast cancer-specific survival by locoregional treatment group and age.**

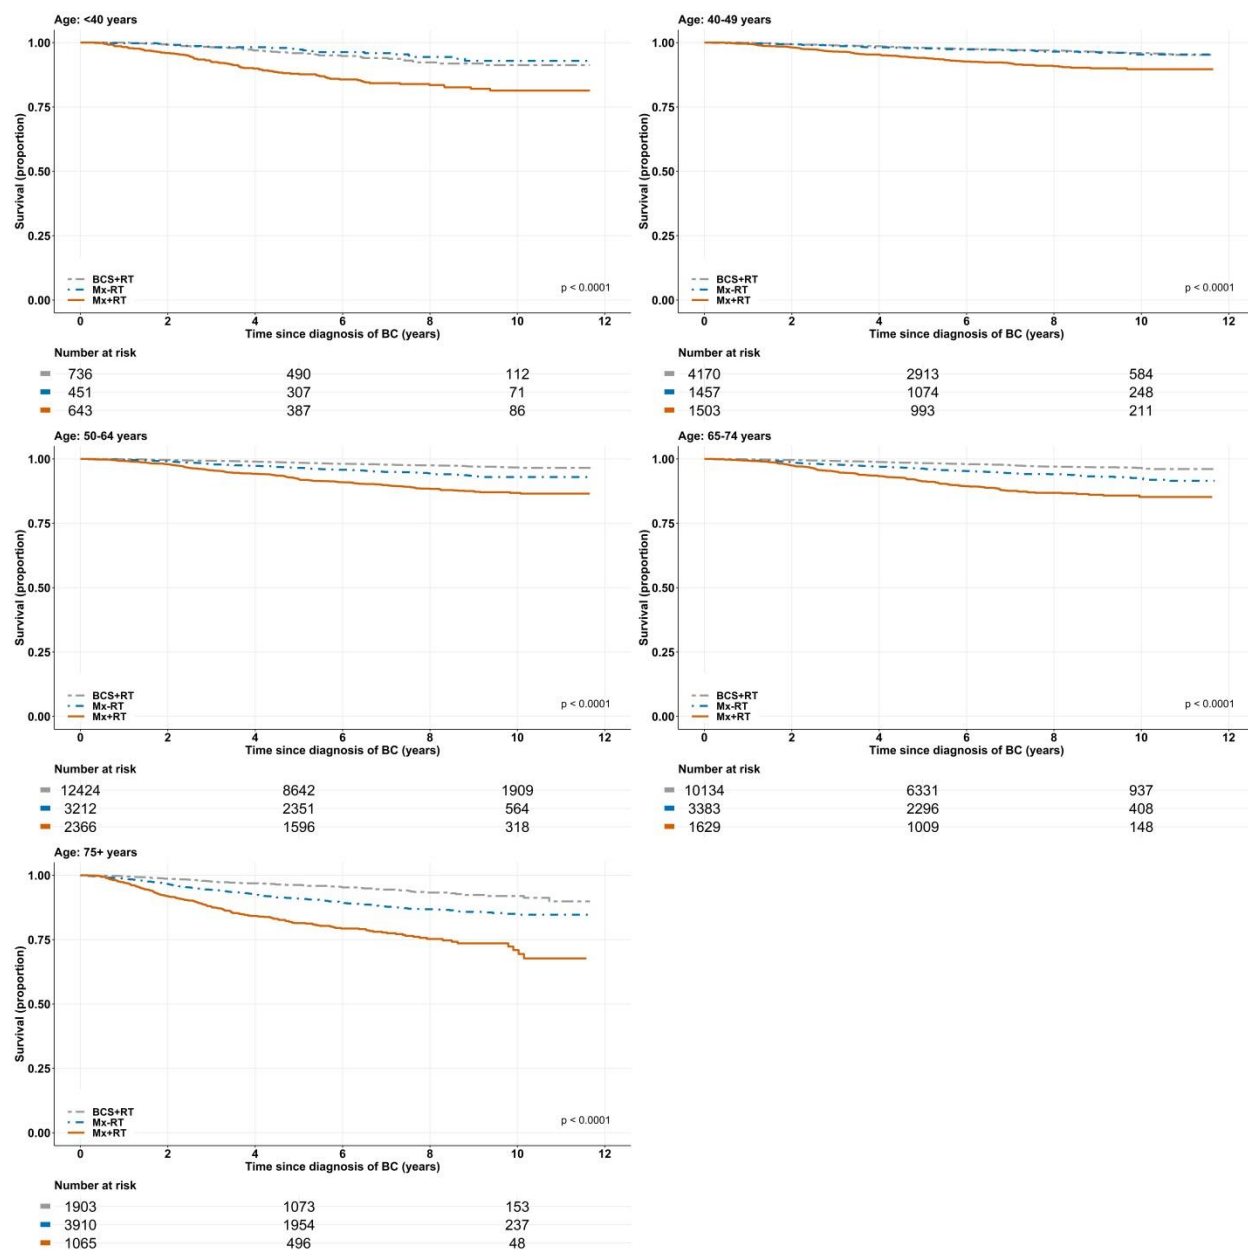

**eFigure 3. Survival proportions for overall survival by locoregional treatment group and prognostic group.**

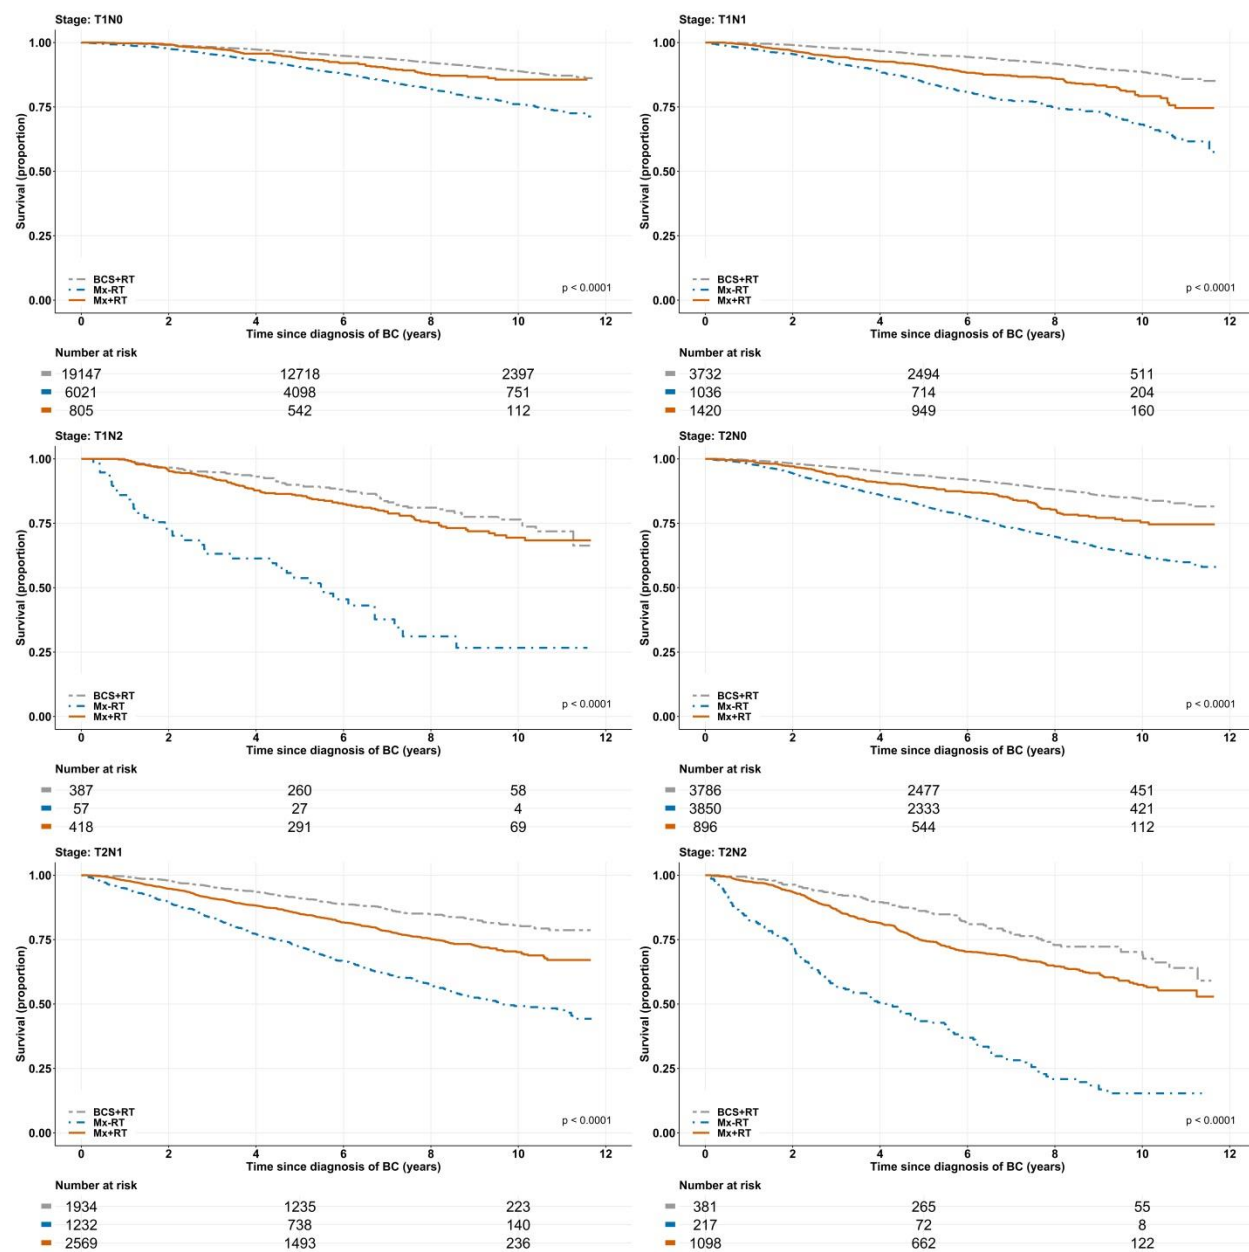

**eFigure 4. Survival proportions for overall survival by locoregional treatment group and age.**

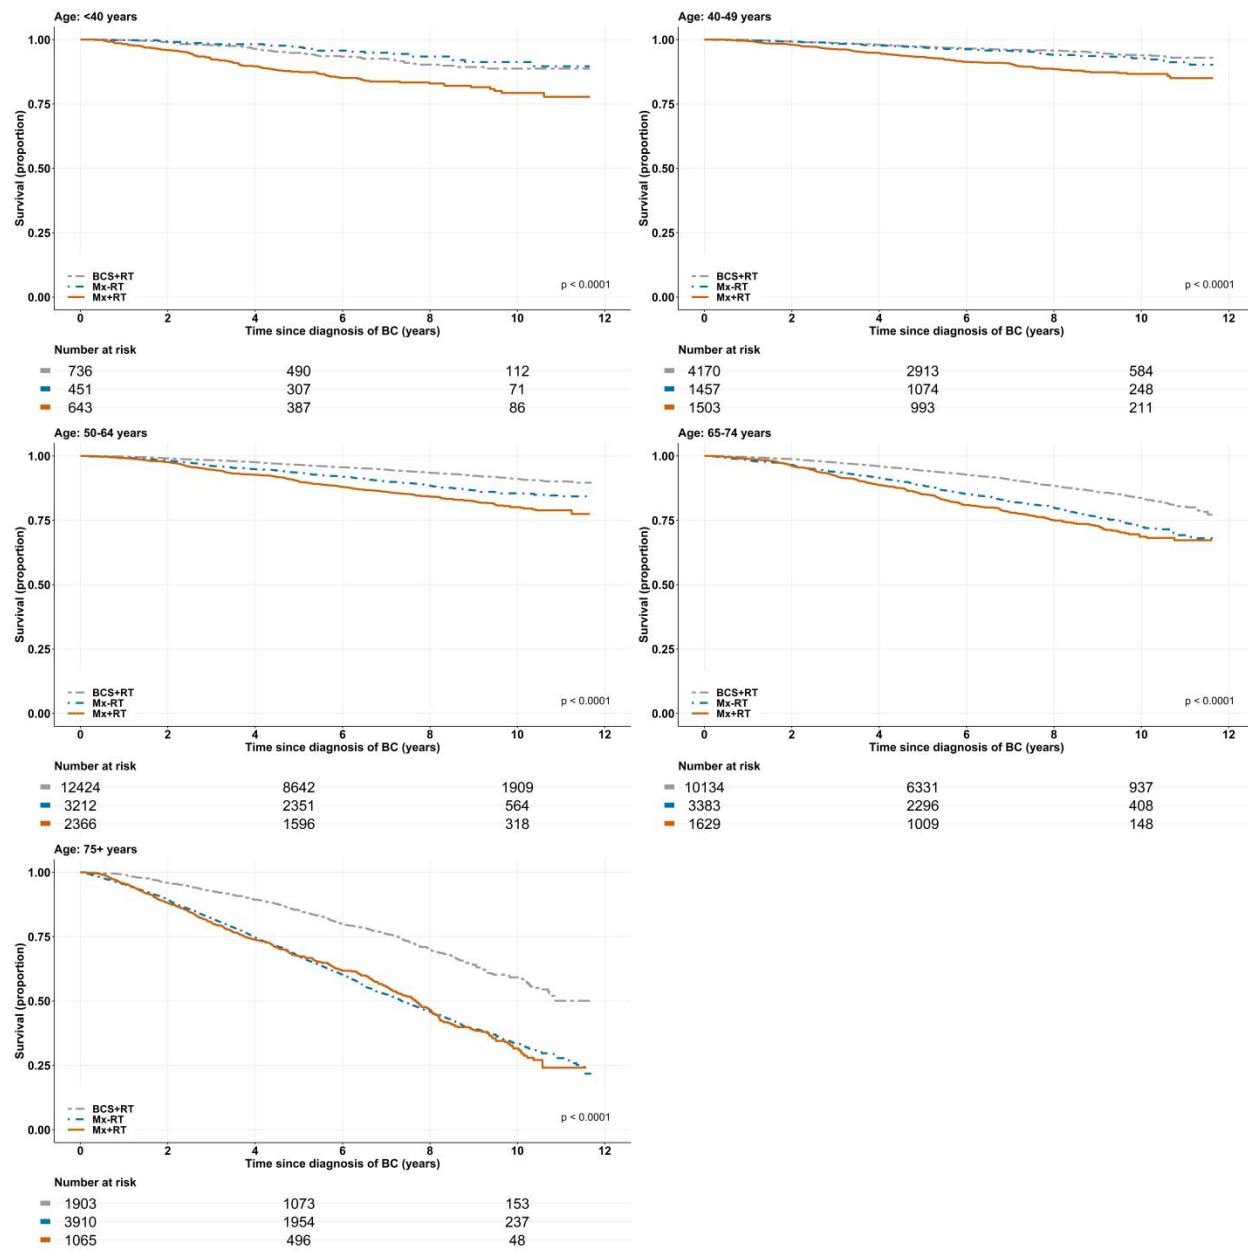

Supplement: jamasurg-e211438-s001.pdf [file jamasurg-e211438-s001.pdf]
